# Supplementary material
Source: publisher site journal article supplement (https://www.dovepress.com/article/407734)
Supplement: Supplementary file 1 [file get_supplementary_file.php]

S1


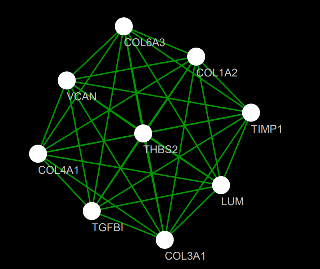


Figure S1 The most important modules are derived from the three functional modules identified in the PPI network and produced using Cytoscape 's MCODE plugin

S2


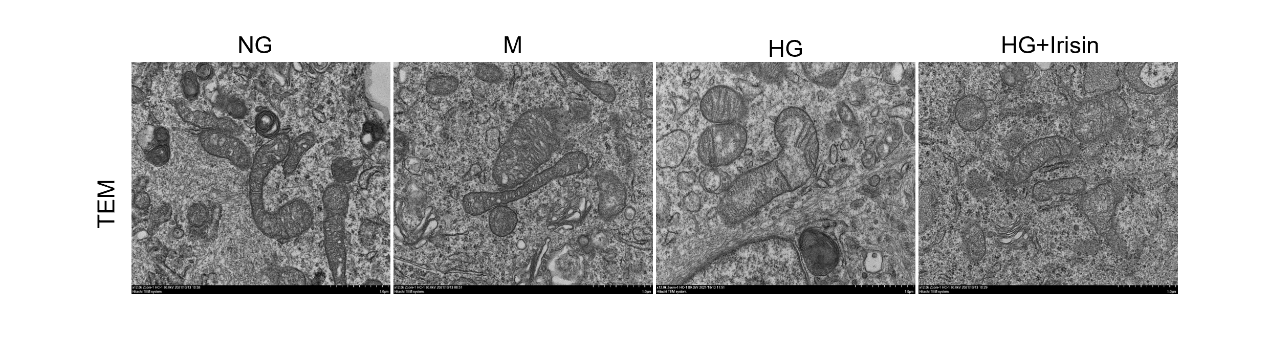


Figure S2 Transmission electron microscopy showed the ultrastructure of mitochondria in HK-2 cells cultured in high glucose for four groups. The results of transmission electron microscopy showed that irisin treatment partially reversed HG-induced mitochondrial swelling and cristae breakage. (Scale bars: 1 μm)

S3 S4


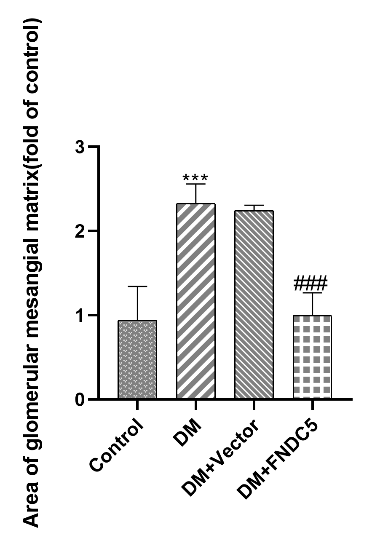

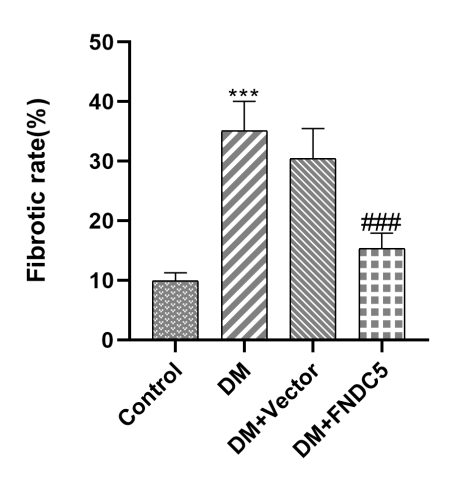


Figure S3-S4 Mesangial matrix deposition area in glomeruli and the percentage of fibrosis area were measured. All experiments were performed independently and repeated at least 3 times. Values are expressed as mean ± SD. ***p < 0.001 vs Control group, ### p < 0.001 vs DM group.

Figure S5-S8. Quantitative data of immunohistochemical staining results in renal tissues of four groups. All experiments were performed independently and repeated at least 3 times. Values are expressed as mean ± SD. *p < 0.05 vs Control group, #p < 0.05 vs DM group.


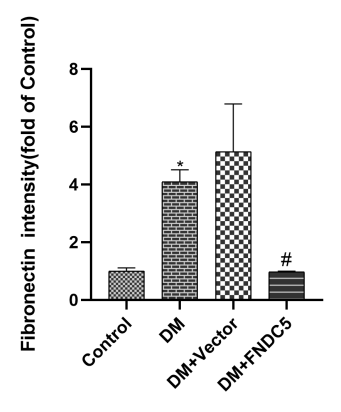

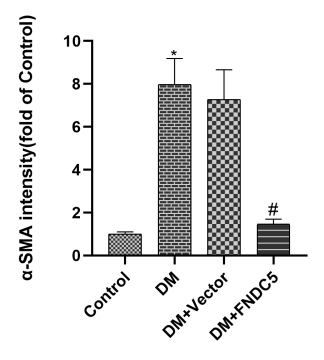


S5

S6

S7

S8


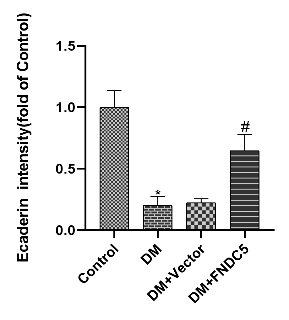

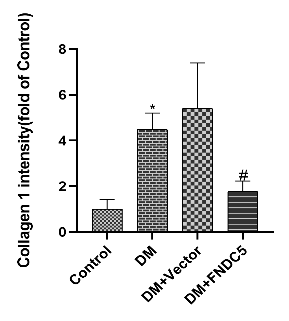


S9


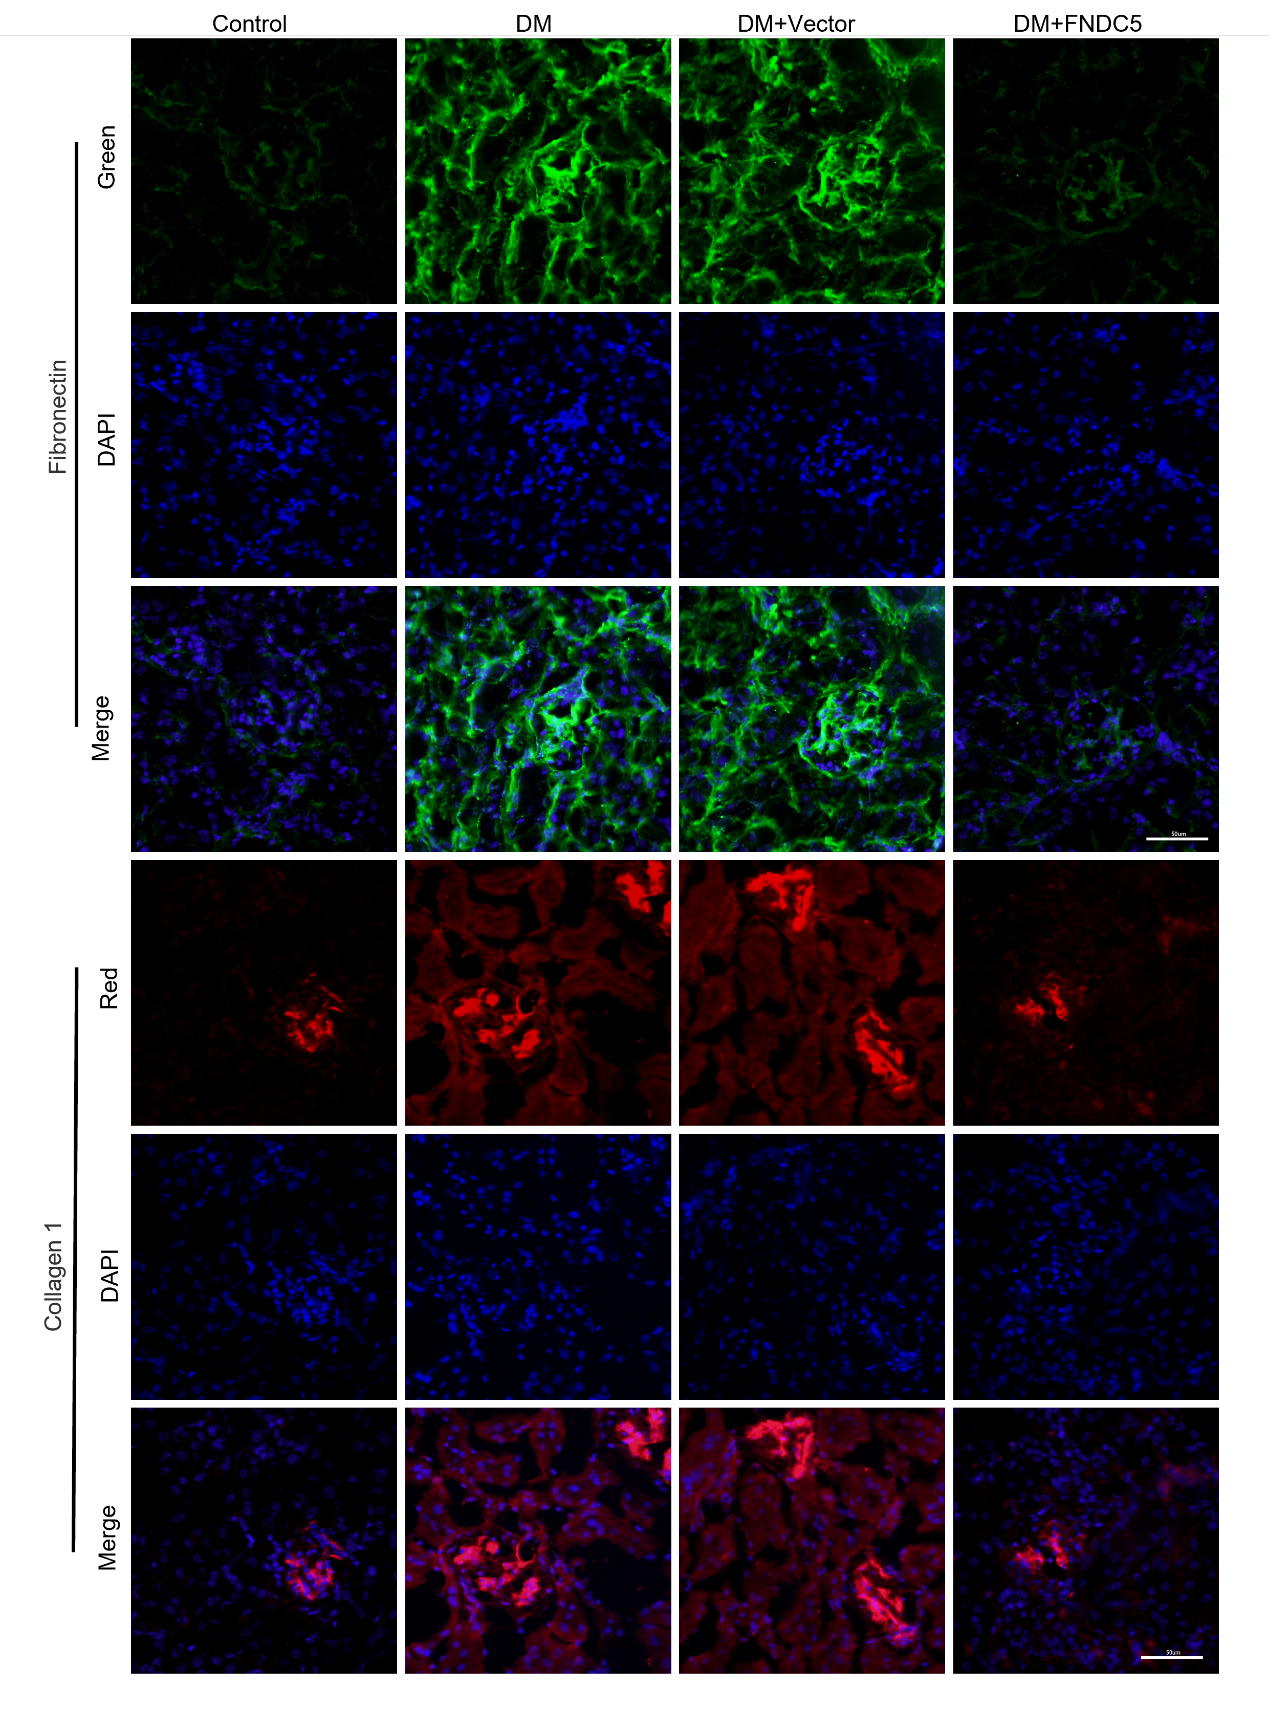


Figure S9. Representative images from immunofluorescence staining of Fibronectin and Collagen 1. Green fluorescein is used to label Fibronectin, and red fluorescein is applied to label Collagen 1. The nuclei are stained blue by DAPI. (Scale bar: 50 μm)

Table S1

The detailed information on the GO analysis of the common DEGS in any two datasets

| Category | Term | Count | PValue |
| --- | --- | --- | --- |
| BP | immune response | 15 | 6.30E-09 |
| BP | inflammatory response | 12 | 6.21E-07 |
| BP | innate immune response | 12 | 2.92E-05 |
| BP | extracellular matrix organization | 11 | 9.11E-08 |
| BP | negative regulation of endopeptidase activity | 10 | 9.74E-09 |
| BP | neutrophil degranulation | 10 | 1.36E-04 |
| BP | G-protein coupled receptor signaling pathway | 10 | 0.044295 |
| BP | signal transduction | 10 | 0.05262 |
| BP | cell adhesion | 9 | 0.001677 |
| BP | antibacterial humoral response | 7 | 1.21E-07 |
| BP | collagen fibril organization | 7 | 4.14E-06 |
| BP | antimicrobial humoral immune response mediated by antimicrobial peptide | 7 | 5.14E-06 |
| BP | positive regulation of apoptotic process | 7 | 0.004209 |
| BP | proteolysis | 7 | 0.008659 |
| BP | adaptive immune response | 7 | 0.009609 |
| BP | platelet degranulation | 6 | 1.50E-04 |
| BP | angiogenesis | 6 | 0.003223 |
| BP | cytokine-mediated signaling pathway | 6 | 0.009833 |
| BP | negative regulation of apoptotic process | 6 | 0.063989 |
| BP | positive regulation of T cell activation | 5 | 9.15E-06 |
| CC | extracellular region | 40 | 3.33E-18 |
| CC | extracellular space | 39 | 8.63E-19 |
| CC | extracellular exosome | 37 | 7.84E-15 |
| CC | plasma membrane | 31 | 0.005621 |
| CC | cell surface | 16 | 1.50E-08 |
| CC | extracellular matrix | 12 | 4.70E-09 |
| CC | integral component of plasma membrane | 12 | 0.025094 |
| CC | endoplasmic reticulum lumen | 8 | 2.01E-04 |
| CC | collagen trimer | 6 | 3.22E-05 |
| CC | blood microparticle | 6 | 2.55E-04 |
| CC | external side of plasma membrane | 6 | 0.030991 |
| CC | platelet alpha granule lumen | 5 | 1.39E-04 |
| CC | basement membrane | 5 | 4.89E-04 |
| CC | endosome membrane | 5 | 0.01592 |
| CC | clathrin-coated endocytic vesicle membrane | 4 | 0.002624 |
| CC | ficolin-1-rich granule lumen | 4 | 0.012785 |
| CC | early endosome | 4 | 0.099708 |
| CC | MHC class II protein complex | 3 | 0.004634 |
| CC | integral component of lumenal side of endoplasmic reticulum membrane | 3 | 0.005746 |
| CC | intrinsic component of plasma membrane | 3 | 0.010225 |
| MF | protein binding | 60 | 0.056663 |
| MF | identical protein binding | 13 | 0.04809 |
| MF | extracellular matrix structural constituent | 10 | 5.73E-09 |
| MF | receptor binding | 10 | 4.21E-05 |
| MF | serine-type endopeptidase inhibitor activity | 8 | 2.34E-07 |
| MF | heparin binding | 8 | 7.34E-06 |
| MF | calcium ion binding | 8 | 0.034821 |
| MF | extracellular matrix structural constituent conferring tensile strength | 5 | 2.49E-05 |
| MF | serine-type endopeptidase activity | 5 | 0.008253 |
| MF | endopeptidase inhibitor activity | 4 | 8.09E-04 |
| MF | integrin binding | 4 | 0.029512 |
| MF | platelet-derived growth factor binding | 3 | 9.15E-04 |
| MF | MHC class II receptor activity | 3 | 0.001291 |
| MF | MHC class II protein complex binding | 3 | 0.005594 |
| MF | cysteine-type endopeptidase inhibitor activity | 3 | 0.008775 |
| MF | peptide antigen binding | 3 | 0.010879 |
| MF | chemokine activity | 3 | 0.01836 |
| MF | calcium-dependent phospholipid binding | 3 | 0.02122 |
| MF | collagen binding | 3 | 0.031674 |
| MF | protein binding, bridging | 3 | 0.068443 |

Table S2

The detailed information on the KEGG enrichment analysis of common DEGs in any two datasets

| Term | Pathway | Count | PValue | Genes |
| --- | --- | --- | --- | --- |
| hsa04145 | Phagosome | 7 | 1.75E-04 | C3, TUBA1A, THBS2, CTSS, HLA-DQA1, HLA-DPA1, HLA-DQB1 |
| hsa05323 | Rheumatoid arthritis | 6 | 1.51E-04 | CXCL6, CCL2, LTB, HLA-DQA1, HLA-DPA1, HLA-DQB1 |
| hsa05150 | Staphylococcus aureus infection | 6 | 1.76E-04 | C3, DEFB1, CFB, HLA-DQA1, HLA-DPA1, HLA-DQB1 |
| hsa05152 | Tuberculosis | 6 | 0.003029 | C3, CALML3, CTSS, HLA-DQA1, HLA-DPA1, HLA-DQB1 |
| hsa05165 | Human papillomavirus infection | 6 | 0.03526 | COL1A2, COL4A1, EGF, FZD6, COL6A3, THBS2 |
| hsa04933 | AGE-RAGE signaling pathway in diabetic complications | 5 | 0.002199 | COL3A1, VCAM1, COL1A2, COL4A1, CCL2 |
| hsa04974 | Protein digestion and absorption | 5 | 0.00245 | COL3A1, COL15A1, COL1A2, COL4A1, COL6A3 |
| hsa04064 | NF-kappa B signaling pathway | 5 | 0.002537 | VCAM1, GADD45B, LY96, LTB, CCL19 |
| hsa04514 | Cell adhesion molecules | 5 | 0.009084 | VCAN, VCAM1, HLA-DQA1, HLA-DPA1, HLA-DQB1 |
| hsa04510 | Focal adhesion | 5 | 0.024699 | COL1A2, COL4A1, EGF, COL6A3, THBS2 |
| hsa04060 | Cytokine-cytokine receptor interaction | 5 | 0.07975 | CX3CR1, CXCL6, CCL2, LTB, CCL19 |
| hsa05310 | Asthma | 4 | 6.43E-04 | FCER1A, HLA-DQA1, HLA-DPA1, HLA-DQB1 |
| hsa05144 | Malaria | 4 | 0.002606 | VCAM1, CCL2, ACKR1, THBS2 |
| hsa05133 | Pertussis | 4 | 0.008457 | C3, CXCL6, LY96, CALML3 |
| hsa05140 | Leishmaniasis | 4 | 0.008766 | C3, HLA-DQA1, HLA-DPA1, HLA-DQB1 |
| hsa04612 | Antigen processing and presentation | 4 | 0.009082 | CTSS, HLA-DQA1, HLA-DPA1, HLA-DQB1 |
| hsa04512 | ECM-receptor interaction | 4 | 0.012607 | COL1A2, COL4A1, COL6A3, THBS2 |
| hsa04061 | Viral protein interaction with cytokine and cytokine receptor | 4 | 0.017743 | CX3CR1, CXCL6, CCL2, CCL19 |
| hsa05145 | Toxoplasmosis | 4 | 0.023888 | LY96, HLA-DQA1, HLA-DPA1, HLA-DQB1 |
| hsa05322 | Systemic lupus erythematosus | 4 | 0.039223 | C3, HLA-DQA1, HLA-DPA1, HLA-DQB1 |

Table S3

The degree values of the top 50 hub genes of common DEGS in any two datasets

| Name | Gene title | Score | LogFC |
| --- | --- | --- | --- |
| CCL2 | C-C motif chemokine ligand 2 | 20 | -1.818 |
| TIMP1 | TIMP metallopeptidase inhibitor 1 | 18 | -2.37719 |
| COL3A1 | collagen type III alpha 1 chain | 14 | -3.32154 |
| THBS2 | thrombospondin 2 | 14 | -2.37363 |
| COL1A2 | collagen type I alpha 2 chain | 13 | -3.107 |
| VCAM1 | vascular cell adhesion molecule 1 | 13 | -1.43136 |
| CTSS | cathepsin S | 13 | -1.91275 |
| VCAN | versican | 11 | -2.98128 |
| THY1 | Thy-1 cell surface antigen | 11 | 1.689596 |
| LUM | lumican | 11 | -2.41695 |
| COL4A1 | collagen type IV alpha 1 chain | 10 | -1.66965 |
| CLU | clusterin | 10 | -2.46909 |
| COL15A1 | collagen type XV alpha 1 chain | 10 | -2.07481 |
| COL6A3 | collagen type VI alpha 3 chain | 9 | -2.40169 |
| TGFBI | transforming growth factor beta 1 | 9 | -1.70938 |
| EGF | epidermal growth factor | 9 | 2.225055 |
| C3 | complement component 3 | 9 | -3.58461 |
| MMP7 | matrix metallopeptidase 7 | 8 | -3.7222 |
| MNDA | myeloid cell nuclear differentiation antigen | 7 | -2.1702 |
| ANXA1 | annexin A1 | 7 | -2.51584 |
| SLPI | secretory leukocyte peptidase inhibitor | 7 | -1.70585 |
| SERPINA3 | serpin family A member 3 | 7 | -2.6513 |
| CD48 | CD48 molecule | 7 | -1.92885 |
| CD53 | CD53 molecule | 6 | -2.2082 |
| RNASE6 | ribonuclease A family member k6 | 6 | -1.81412 |
| SERPINF1 | serpin family F member 1 | 6 | -1.34417 |
| CCL19 | C-C motif chemokine ligand 19 | 6 | -2.04188 |
| APOH | apolipoprotein H | 6 | 2.283968 |
| CX3CR1 | C-X-C motif chemokine receptor 1 | 6 | -2.18007 |
| MS4A6A | membrane spanning 4-domains A6A | 6 | -1.9805 |
| HRG | histidine rich glycoprotein | 6 | 1.165366 |
| FGL2 | fibrinogen like 2 | 6 | -1.47539 |
| LPL | lipoprotein lipase | 5 | 2.132283 |
| LTF | lactotransferrin | 5 | -4.5225 |
| CFB | complement factor B | 5 | -2.34863 |
| CXCL6 | C-X-C motif chemokine ligand 6 | 5 | -4.22223 |
| LY96 | lymphocyte antigen 96 | 4 | -2.37404 |
| CD52 | CD52 molecule | 4 | -1.96201 |
| AGR2 | anterior gradient 2, protein disulphide isomerase family member | 4 | -2.07325 |
| WFDC2 | WAP four-disulfide core domain 2 | 4 | -2.01621 |
| HLA-DQA1 | major histocompatibility complex, class II, DQ alpha 1 | 4 | -1.7585 |
| HLA-DPA1 | major histocompatibility complex, class II, DPalpha 1 | 4 | -2.656 |
| HLA-DQB1 | major histocompatibility complex, class II, DP beta 1 | 4 | -1.382 |
| FCER1A | Fc fragment of IgE receptor Ia | 3 | -1.99308 |
| EVI2A | ecotropic viral integration site 2A | 3 | -2.74674 |
| ACKR1 | atypical chemokine receptor 1 (Duffy blood group) | 3 | -1.56704 |
| DEFB1 | defensin beta 1 | 3 | 1.084826 |
| IFI16 | interferon gamma inducible protein 16 | 3 | -2.03743 |
| FOSB | FosB proto-oncogene, AP-1 transcription factor subunit | 3 | 2.214993 |
| GADD45B | growth arrest and DNA damage inducible beta | 2 | 1.28208 |
